1 **D155Y Substitution of SARS-CoV-2 ORF3a Weakens Binding with Caveolin-1: An *in***  
2 ***silico* Study**

3

4 Suchetana Gupta<sup>a¥</sup>, Ditipriya Mallick<sup>b¥</sup>, Kumarjeet Banerjee<sup>b¥</sup>, Soumyadev Sarkar<sup>c</sup>, Sonny T  
5 M Lee<sup>c</sup>, Partha Basuchowdhuri<sup>a#</sup>, Siddhartha Sankar Jana<sup>b#</sup>

6 <sup>a</sup>School of Mathematical and Computational Sciences, Indian Association for the Cultivation  
7 of Science, India

8 <sup>b</sup>School of Biological Sciences, Indian Association for the Cultivation of Science, India

9 <sup>c</sup>Division of Biology, Kansas State University, USA

10

11

12

13 #Correspondence: Siddhartha Sankar Jana, [bcssj@iacs.res.in](mailto:bcssj@iacs.res.in) and Partha Basuchowdhuri,  
14 [partha.basuchowdhuri@iacs.res.in](mailto:partha.basuchowdhuri@iacs.res.in)

15 ¥Authors contributed equally

16

17 Running Head: D155Y substitution of ORF3a weakens binding with Caveolin-1

18

19 **Keywords:**

20 ORF3a, SARS-CoV-2, Molecular Dynamics Simulation, Graph theory, Mutation, Caveolin-1

21

22 Word count for the abstract: 234

23 Word count for the text: 4272

## 24 **Abstract**

25 The clinical manifestation of the recent pandemic COVID-19, caused by novel SARS-CoV-2,  
26 varies from mild to severe respiratory illness. Although environmental, demographic and co-  
27 morbidity factors have an impact on the severity of the disease, the contribution of mutations  
28 in each of the viral genes towards the degree of severity needs to be elucidated for designing  
29 better therapeutic approach against COVID-19. Here, we studied the effect of two  
30 substitutions D155Y and S171L, of ORF3a protein, found in COVID-19 patients. Using  
31 computational simulations we discovered that the substitutions at 155<sup>th</sup> and 171<sup>st</sup> positions  
32 changed the amino acids involved in salt bridge formation, hydrogen-bond occupancy,  
33 interactome clusters, and the stability of the protein. Protein-protein docking using  
34 HADDOCK analysis revealed that out of the two observed substitutions, only the substitution  
35 of D155Y, weakened the binding affinity of ORF3a with caveolin-1. The increased  
36 fluctuation in the simulated ORF3a-caveolin-1 complex suggested a change in the virulence  
37 property of SARS-CoV-2.

## 38 **Importance**

39 The binding interaction of viral ORF3a protein to host caveolin-1 is essential for entry and  
40 endomembrane trafficking of SARS-CoV-2. The D155Y substitution in SARS-CoV-2  
41 ORF3a is located near its caveolin-binding Domain IV and thus the substitution can interfere  
42 with the binding affinity of ORF3a to host caveolin-1. Our *in silico* study report decreased  
43 molecular stability of D155Y mutant of ORF3a and increased fluctuation of the simulated  
44 D155Y ORF3a-caveolin-1 complex. Thus, we hypothesize that the D155Y substitution could  
45 change the virulence property of SARS-CoV-2.

46

47

48

49

50

51

52

## 53 **1. Introduction:**

54 The Severe Acute Respiratory Syndrome Coronavirus 2 (SARS-CoV-2) is the causative  
55 agent of the novel Coronavirus Disease 2019 (COVID-19)[1].Till February 2021, 114.1  
56 million cases have been reported worldwide spanning across 215 countries and territories, out  
57 of which 11.1 million people have been infected with SARS-CoV2 in India[2].Mortality rate  
58 across the world varies drastically from 9.1% (Mexico) to 0.9% (Turkey) [3].Although age,  
59 ethnicity and sex contribute to the demographic variation in the viral transmission and its case  
60 fatality rate, how mutation in viral genome can change, in such variation for pathological  
61 manifestation needs to be explored.

62 The SARS-CoV-2 genome consists of approximately 30 kilobases and shares about 82%  
63 sequence identity with both SARS-CoV and MERS-CoV. It also shares more than 90%  
64 sequence identity for essential enzymes and structural proteins [4].Despite the similarity, only  
65 SARS-CoV-2 shows severe pathological manifestations in humans, suggesting the existence of  
66 differential molecular interactions between viral proteins and host cell machinery.

67 The SARS-CoV-2 genome broadly consists of 14 open reading frames (ORF), which are  
68 generated from nested transcription of subgenomic RNAs. Interestingly, ORF1a and 1b  
69 encode for 16 non-structural proteins (nsp) known as replicase/transcriptase complex. The  
70 other ORFs code for 4 structural proteins and 8 accessory proteins [1,4].ORF3 is wedged  
71 between spike (S) and envelop (E) ORFs and encodes for a membrane-spanning, ion channel  
72 protein ORF3a. It is also known as the single largest accessory protein of 275 amino  
73 acids[5,6]. Ribosomal profiling has identified two putative overlapping genes, namely  
74 ORF3b and ORF3c, at the 3' end of ORF3 with an alternative reading frame to the canonical  
75 ORF3a[7-10], whose functional importance is not well understood. ORF3a can localise at  
76 plasma membrane and Golgi complex, and can exist in both glycosylated and non-  
77 glycosylated forms[11]. This viral protein has been shown to be highly immunogenic as  
78 antisera isolated from SARS-CoV-infected patients can detect ORF3a [10]. Yount *et. al* and  
79 others have shown that ORF3a has been co-evolved with Spike (S) protein, suggesting the  
80 possibility of direct or indirect interactions between ORF3a and S protein[10,12,13].Studies  
81 in SARS-CoV-infected Caco2 cells show that ORF3a can be efficiently released in detergent-  
82 resistant membrane structures and the diacidic motif, ExD, located within the domain VI,  
83 plays important role in membrane co-localisation[14].ORF3a has multi-functional roles  
84 including activating NLRP3 inflammasome and NFkB pathway, upregulating fibrinogen

85 secretion, downregulating IFN Type I and inducing ER stress and pro-apoptotic activity[5,15-  
86 17].Therefore, mutations in this protein warrant further study to understand its role in the  
87 virulence and immune evasive potential of the recent SARS-CoV-2.Several mutations have  
88 been reported in the ORF3a gene and have been classified in the form of clades and sub-  
89 clades.The mutation patterns of ORF3a gene have been characterized as largely non-  
90 synonymous(Q57H, H93Y, R126T, L127I, W128L, L129F, W131C, D155Y,S171L, D173Y,  
91 G196V, and G251V). G251V and Q57H exhibit severe virulence property[18-  
92 21].Interestingly, the 57<sup>th</sup> position in ORF3a of pangolin SARS-CoV is H. D155Y and S171L  
93 mutations were detected in Indian patients in May 2020[22]. To understand the functional  
94 importance of these mutants, their characterization is needed.

95 Our study aims to understand the effect of these two substitutions (D155Y and S171L) in the  
96 structural stability of the ORF3a protein and its ability to form complex with caveolin-1.  
97 Using computational simulation, protein-protein docking we find that the amino acids  
98 involved in the hydrophobic interactions, hydrogen bond formation, salt bridge formation and  
99 residue interaction patterns are different in wild type (WT), i.e., the original Wuhan  
100 sequence compared with the two mutants having D155Y and S171L substitutions.

101

## 102 **2. Methods:**

### 103 **2.1 Bioinformatic Methods**

104 A total of 26,656 sequences of ORF3a protein deposited in NCBI database as on Nov 17,  
105 2020 were considered for the bioinformatics analysis. The keywords used for the search were  
106 “SARS-CoV-2”, “ORF3a protein”, and “complete structure”. These structures were aligned  
107 using the BLAST algorithm on the NCBI website. Some of the post-BLAST sequences were  
108 larger than 275 due to erroneous performance of the code. But such cases were very low in  
109 number. Subsequently, the erroneous sequences were manually cleaned to obtain the final  
110 alignments of the complete protein sequences (275 amino acids). The number of samples  
111 whose locations were geo-tagged to India was 614. These sequences were then compared to  
112 the Wuhan sequence (NCBI Accession No: YP\_009724391.1[23]) and the amino acid  
113 positions were compared. The positions, where mismatches were observed with respect to the  
114 reference Wuhan sequence (WT), were considered as locations of mutations. Clearly, lesser  
115 number of mutations denote a sequence more similar to the WT, whereas more number of  
116 mutations denote a more deviant mutant. Overall the sequences found from NCBI database

117 were compared against the WT and the number of mutations for every position of ORF3a was  
118 stored. This essentially provides us with the frequency distribution of the mutations found at  
119 each position of ORF3a. We have used PROVEAN score to assess whether the effect of a  
120 mutation is deleterious or neutral. PROVEAN score of each mutation was determined using  
121 PROVEAN web server [24].

122

## 123 **2.2 Preparation of structure of the ORF3a proteins**

124 The cryo-EM structure of WT ORF3a protein of SARS-CoV-2 was obtained from PDB (PDB  
125 ID: 6XDC[25]). The symmetry information present in the PDB file was used to convert the  
126 structure into the functional dimeric form using PDBE PISA server online [26]. The residues  
127 on the second monomer have been numbered using “ ’ ” throughout the manuscript. As no  
128 homologous structure of the protein was available, we considered the PDB structure of  
129 ORF3a, which has residues from 40<sup>th</sup> to 238<sup>th</sup>. We introduced the necessary mutations  
130 (D155Y and S171L) by modelling the residues in Swiss PDB Viewer[27].

131

## 132 **2.3 Molecular dynamics simulation**

133 We performed classical Molecular Dynamics (MD) simulation in AMBER20[28] using  
134 AMBER ff14sb force field[29]. The missing hydrogen atoms in the protein structure were  
135 added by the LEaP module of AMBER20 package. The protein was then subjected to energy  
136 minimisation for 2000 steps using steepest descent and conjugate gradient algorithms. We  
137 then solvated the energy minimised structures using rectangular water boxes comprising of  
138 TIP3P water molecules [30]. Particle mesh Ewald was used to calculate the electrostatic  
139 interactions at a cut-off distance of 12Å. We performed initial minimisation and equilibration  
140 in order to avoid bad contacts. This was followed by equilibration using NVT ensemble at  
141 300K for about 500ps. The systems were then equilibrated using NPT ensemble at 1 atm  
142 pressure for 1 ns. We considered 2fs as the time step throughout the minimisation-  
143 equilibration-production. After the energy values and the density values converged, the  
144 systems were subjected to 100ns production runs using NPT ensemble at 300K and 1 atm  
145 pressure. The coordinates were saved after intervals of 2ps. We performed the analyses  
146 CPPTRAJ module of AMBER[31] and visualizations were performed using VMD [32]. The  
147 binding energies for the complexes were calculated using MMGBSA[33] suite of AMBER.

148

## 149 **2.4 Graph theory**

150 We used graph theory to decipher the composition of interactomes in terms of participating  
151 amino acids involved in pairwise interactions. Briefly, the graph structure  $G(V, E, W)$  is  
152 denoted by three sets. The first one is, the set of residues, denoted as the vertex set ( $V$ ) of a  
153 graph. Each individual residue, here, is considered as an independent entity, formally termed  
154 as a vertex or a node. Say, we denote  $V$  as  $\{v_1, v_2, v_3, \dots, v_n\}$ , where  $v_i$  is the  $i^{\text{th}}$  residue.  
155 Therefore,  $|V| = n$ , where  $n$  is the number of nodes in the graph, otherwise also known as the  
156 order of the graph. The second set is the set of interactions between residues denoted as the  
157 edge set ( $E$ ). The interaction between the  $i^{\text{th}}$  and the  $j^{\text{th}}$  residue may be represented as an edge  
158  $e(v_i, v_j)$  and the edge set  $E$  may be represented as  $\{e_1, e_2, e_3, \dots, e_m\}$ . Therefore,  $|E| = m$ ,  
159 where  $m$  is the number of edges in the graph, otherwise also known as the size of the graph.  
160 Please note that the edges have not been considered as directed because, there is no  
161 significance of the roles of the interacting residues in these interactions. We initially calculate  
162 the average energy values (calculated per unit time) over the time of observation for all  
163  ${}^n C_2$  possible interactions. Some of them turn out to be high and are deemed insignificant. We  
164 use a threshold to remove the average energy values of those interactions. Here,  $m$  is the  
165 number of interactions with significant average energy values. These average energy values  
166 represent the importance of the interactions and may be denoted as the set of edge weights  
167 ( $W$ ). For every edge, there is a corresponding edge weight, therefore it may be concluded that  
168  $|W| = m$ .

169 In this work, we are interested in studying the interaction dynamics of the residues. Due to  
170 the difference in interaction energies, from observation, we could intuitively understand that a  
171 group of residues are more prone to interact among themselves than the other residues. But,  
172 to discover underlying densely interacting residue groups or clusters, we apply algorithms  
173 that could reveal the clusters accurately. The equivalent problem in residue-residue  
174 interaction graphs or networks is known as graph clustering. We have used one of the most  
175 popular community detection techniques, Louvain method, to find out the clusters in this  
176 residue interaction network[34]. Please note that we have used the terms cluster and  
177 community interchangeably. It provides us with a cover  $C = \{c_1, c_2, c_3, \dots, c_k\}$ , where  $k$  is  
178 the number of communities and  $c_i$  is the  $i^{\text{th}}$  cluster/community. Each vertex in  $V$  belongs to  
179 exactly one of the clusters. Therefore, union of the vertex sets of all the clusters would lead  
180 back to  $V$ .

181

## 182 **2.5 Modelling the protein-protein interaction complex**

183 We used hierarchical approach to predict the structure of the protein in the absence of a  
184 suitable template structure for caveolin-1. I-TASSER server was used to generate five initial  
185 models[35-37]. One model was selected based on the C-score (confidence score). The model  
186 was then evaluated using the SAVES v5.0 server, where Ramachandran plot and ERRAT  
187 analyses were performed[38,39]. Model visualizations were done using Chimera[40]. This  
188 model was then simulated for 100ns to generate a more stable structure. The average  
189 structure was then considered as the initial structure for docking after proper structural  
190 evaluation by Ramachandran Plot and ERRAT analyses[38,39]. The two molecules of human  
191 caveolin-1 were docked to the WT ORF3a by using HADDOCK[41]. HADDOCK not only  
192 considers traditional energetics and shape complementarity, but also incorporates  
193 experimental data in terms of restraints to guide the docking of two proteins. The residues of  
194 domain IV on ORF3a and the residues Asp82 to Arg101 on human caveolin-1 were defined  
195 as active residues in docking based on the cryo-EM structure information[42]. On the basis of  
196 the most negative binding energy, we selected a starting structure for the WT ORF3a-  
197 caveolin-1 complex. Necessary mutations were introduced in these structures by modelling  
198 with the Swiss PDB Viewer. These structures were subjected to all atomic MD simulations.

199

## 200 **3Results:**

### 201 **3.1 Worldwide prevalence of D155Y and S171L substitution of ORF3a**

202 ORF3a protein is important for the viral infection, spreading and modulating the host immune  
203 system. To understand the role of mutations in the function of this protein, we first checked  
204 the prevalence of each mutations found in ORF3a. Fig. 1a shows the number of mutant  
205 samples at each position of the ORF3a protein in the global and Indian population from a  
206 total of 26,656 samples, deposited in NCBI dataset (dated November 17, 2020). From this  
207 figure, we observe that mutations occur at 258 positions of the protein for the global  
208 population. Whereas, for the Indian population, mutations were found only at 13  
209 positions. Mutations at the 57<sup>th</sup> position were the highest in both the global and the Indian  
210 population. For the Indian population, the positions 155<sup>th</sup> and 171<sup>st</sup> showed two instances of  
211 mutations while the number of instances was 23 and 34 respectively in the global population.  
212 Fig. 1b shows the distribution of these mutations worldwide. The mutations in ORF3a protein



213 for both world and Indian populations are distributed in the entire protein. Table S1 shows a  
214 list of the mutation counts we have found at all the positions of the ORF3a protein sequence.

215

### 216 **3.2 Description of the protein systems**

217 The SARS-CoV-2 ORF3a protein can form dimer[43]. The monomeric ORF3a has been  
218 divided into six domains, each having its own functional importance[20]. Fig. 2 shows the  
219 locations of D155Y and D155'Y (red spheres) and S171L and S171'L (cyan spheres). The  
220 locations of these substitutions between domains IV and V, and in domain VI suggest their  
221 possible role in caveolin binding, intracellular protein sorting and intracellular membrane  
222 trafficking of ORF3a[20].

223

### 224 **3.3 Stability of the two ORF3a variants, D155Y and S171L**

225 The cryo-EM structure of WT ORF3a protein (residues 40 to 238) was downloaded from the  
226 Protein Data Bank (PDB ID: 6XDC) and processed as discussed in the methodology section.  
227 The substitutions D155Y and S171L on each monomer were modelled on the WT structure  
228 separately using SwissPDBViewer[27]. Each of these structures was simulated in triplicate  
229 till 200ns. Fig. 3 shows the time evolution of the root mean square deviation (RMSD) of the  
230 simulated structure with respect to the starting frame of simulation. Note that WT and both  
231 mutants have shown reasonable stability. WT and D155Y (black and red profiles in Fig. 3)  
232 showed lesser RMSD (the final RMSD being 2.25Å) and lesser fluctuation, whereas the  
233 S171L (green profile in Fig. 3) variant showed higher RMSD (the final RMSD being  
234 2.75Å). The overall fluctuation in RMSD was also greater in S171L compared to the WT and  
235 D155Y. This indicates that S171L substitution causes more deviation and may interfere with  
236 its membrane localisation. However, the final RMSD values attained by the WT and the two  
237 mutants were comparable, indicating a similar final simulated structure. So it can be  
238 concluded that the substitutions at D155Y and S171L do not cause a major conformational  
239 change of ORF3a from the WT.

### 240 **3.4 Differential behaviour of the constituent residues**

241 While RMSDs are a measure of the overall stability of the biological systems under  
242 consideration, the B-factor values give an idea on the flexibility of the individual residues.  
243 The B-factor values were measured to determine the average flexibility of the protein  
244 residues around their mean position across all trajectories (Fig. 4). Fig. 4 shows that the



245 residues in the WT ORF3a protein exhibit the least deviation from their mean position,  
246 whereas the residues in both mutants show more flexibility. Interestingly, in the D155Y  
247 variant, the 155<sup>th</sup> residue showed higher flexibility compared to the WT (14.52 Å<sup>2</sup> for WT and  
248 61.7 Å<sup>2</sup> for D155Y and 16.95 Å<sup>2</sup> for WT and 55.3 Å<sup>2</sup> for the D155Y at positions 155 and 155'  
249 respectively). Similarly, for the S171L variant, the flexibility of the 171<sup>st</sup> residue in the  
250 mutant was higher than the WT or D155Y (13.69 Å<sup>2</sup> for WT and 64.94 Å<sup>2</sup> and 26.59 Å<sup>2</sup> for  
251 WT and 124.48 Å<sup>2</sup> for S171L at positions 171 and 171' respectively). The terminal residues are  
252 exposed to solvent and are more flexible, resulting in their high B-factor values as seen in  
253 Fig. 4 (as marked). Several other residues which are located both near the positions of  
254 mutations as well as distally also showed greater flexibility. We thus observe an effect of the  
255 mutation on the overall dynamics of the protein at distant locations. Thus, these mutations  
256 may have allosteric effects on the domain specific function of the ORF3a protein.

257

### 258 **3.5 Differential contribution of stabilizing residues in the ORF3a proteins**

259 The WT and the mutant ORF3a proteins were analysed to understand the role of individual  
260 amino acids, hydrogen bond occupancies and salt bridges in their structural stability. The free  
261 energies of the three variants (WT and the two mutants) were calculated by using the  
262 MMGBSA module of Amber20 and are tabulated in Table 1, which shows the differences in  
263 stability among them. The S171L mutant with a free energy of -5376.51 (± 19.34)  
264 kcal/mol was the most stable, followed by WT (-5356.85 ± 12.95 kcal/mol) and D155Y mutant  
265 (-5266.41 ± 12.56 kcal/mol). This indicates that the mutants D155Y and S171L can also exist  
266 independently just like the WT ORF3a protein. To understand the contributing factors for  
267 these variations in stabilizing energy, we looked at the contributions of each amino acid to the  
268 overall free energy and tabulated the top contributors for each variant in Table 2. While we  
269 observe that the group of residues contributing to the overall stability remains almost  
270 unchanged among the variants, their ranking differs. For instance, in WT, Arg68 plays the  
271 most important role, whereas in case of the mutant systems, it is Arg126' that has the most  
272 contribution. However, Arg68 features as the second most contributory residue in D155Y  
273 mutant, whereas in the S171L mutant, it has the fourth position. In this mutant, the Arg126  
274 plays the second most important role, following its corresponding residue on the second  
275 monomer.

276 We also checked the hydrogen bond interactions in WT and the two mutant ORF3a proteins,  
277 and found that the total number of hydrogen bonds remain same (average number is 95, Fig.  
278 S1), in all the three variants. In contrast, the individual residues that have the most hydrogen

279 bond occupancy vary among the ORF3a proteins. We found that the top three residue pairs  
280 involved in forming hydrogen bonds with the maximum occupancy are Tyr156'-Lys192',  
281 Arg134-Asp155 and Ser205'-Asn144'. In D155Y, the top three residue pairs forming the  
282 hydrogen bonds with maximum occupancy are Tyr212'-Thr164, Ser205'-Asn144' and  
283 Ser205-Asn144. In the mutant S171L, the top three residue pairs forming hydrogen bonds  
284 with maximum occupancy are Leu203-Asp210, Leu203'-Asp210' and Thr89-Leu85'. A  
285 detailed list is given in Table S2. We also calculated the salt bridge interactions for the WT  
286 and the two mutant proteins and tabulated the list of salt bridges in Table S3, which shows  
287 that D155Y forms lesser number (24) of salt bridges compared to the WT and the S171L (31  
288 each). Interestingly, mutation at position 155, but not at 171, breaks the salt bridge formation  
289 between Asp155-Arg134. This residue pair is formed at the end of the alpha helix and the  
290 beginning of a beta sheet in the proximity of domains III and IV of ORF3a. Thus this loss of  
291 salt bridge interaction in D155Y is significant and may play a role in the binding affinity of  
292 the interacting partner of the ORF3a protein at this region.

293

### 294 **3.6 Changes in interactome interactions – A graph theoretic perspective**

295 The variation in hydrogen base pairing and salt bridges prompted us to check the interactome  
296 interactions in ORF3a variants. We represented the interactions between the interactomes in  
297 terms of a network. The pairwise hydrophobic interaction energies of the residues in the WT  
298 and the two mutants of ORF3a were calculated using MMGBSA suite of Amber20. These  
299 hydrophobic interaction energies were considered for building a residue-residue interaction  
300 network for the WT and the two mutant proteins. Here, we have used graph data structures  
301 and relevant algorithms, to model the interactions among the residues.

302 The spatial orientation of the protein, adjacency of the residues and interactions among them  
303 play a role in finding the clusters or communities of interacting residues. In the visualization  
304 of the clusters, as seen in Fig. 5a, we see the whole interaction network and an overview of  
305 the clusters. In Fig. 5b, we zoom on one part of the graph and provide a closer view of the  
306 interactions. The node colours denote its affiliation to a certain cluster. The edge colours are  
307 determined by the colours of the nodes it is incident upon. The edge thickness denotes the  
308 strength of the interactions between the residues, i.e., the weight of the edge. In Fig. 5c, one  
309 residue has been selected to show the nodes adjacent to it (also known as its neighbourhood).  
310 Fig. 6 shows these clusters as can be seen in the actual protein. We observe that the  
311 membership of the residues in the clusters in each protein has shown substantial variation. A

312 list of the clusters and their constituent residues has been provided for the WT and the two  
313 mutants (D155Y and S171L) in Table S4. Fig. 6 and Table S5 indicate that the residues of the  
314 functional domains have rearranged in different interacting clusters in WT and the two  
315 mutants. Domain III being the largest in size has split into the most number of clusters.  
316 However, the clusters are different in terms of the constituent residues for WT and the two  
317 mutants. Thus, we may conclude that the mutations have changed the interaction patterns of  
318 the interactomes present in the protein. Due to changes in residue interactions, the clusters  
319 have changed from WT to the other mutants. But it should be noted that the cluster  
320 membership for the nodes in the regions of mutations do not change. This indicates that the  
321 mutations may have distal effects too, which can be explored further for better understanding  
322 of the protein function.

323

### 324 **3.7 Formation of complex with partner protein caveolin-1**

325 We are interested to check if the substitution can change the binding interaction of ORF3a  
326 protein with host caveolin-1. Issa *et al.* [20] have suggested that domain IV of ORF3a binds to  
327 caveolin-1 protein, which is required for viral uptake and regulation [44,45]. We modelled  
328 caveolin-1 using a hierarchical approach to predict the structure of the protein. Five initial  
329 models were then generated using the I-TASSER server. Out of these, one model was  
330 selected based on the C-score (confidence score). This model was then evaluated using the  
331 SAVES v5.0 server, where Ramachandran plot analysis and ERRAT analysis were  
332 performed as shown in Fig. 7a-b. Ramachandran plot showed that 96.9% of the residues of  
333 caveolin-1 were within the favoured and allowed regions, while 3.1% of the residues were in  
334 the disallowed regions. On the other hand, ERRAT analysis had an overall quality factor of  
335 89.412.

336 The modelled structure of human caveolin-1 was simulated for 100ns to generate a well  
337 equilibrated and stable structure. The stability of the simulation, as evident from the time  
338 evolution of the RMSD of the protein from its starting structure, has been shown in Fig. S2a.  
339 The average structure from this simulation (Fig. S2b) was considered as the starting structure  
340 of the ORF3a-caveolin-1 complex after proper structural evaluation (Fig. 7c-d).  
341 Ramachandran plot of the average simulated and stable structure showed that 98.1% of the  
342 residues were within the ranges of favourable and allowed regions, and only 1.9% of the  
343 residues were in the disallowed regions. ERRAT plot too showed an improvement with the  
344 overall quality factor increased to 94.304%. Thus, both Ramachandran plot and ERRAT

345 analysis (Fig. 7c-d) indicated that thecaveolin-1 model was of acceptable quality, and could  
346 be used as the starting structure for docking.

347 We carried outour protein-protein docking using the HADDOCK webserver[41,46]. We  
348 consider binding domains on ORF3a and caveolin-1 as the interacting residues [42]. Our  
349 analysis generated twelve probable structures from three clusters as shown in Fig. S3. In each  
350 of these structures, we had two molecules of the human caveolin-1 interacting with the  
351 dimeric form of ORF3a protein. The top structure from the topmost cluster (left-most  
352 structure in first row of Fig. S3), having a HADDOCK score of -155.3 ( $\pm 22.2$ ) was  
353 considered as our starting structure. This structure showed a symmetrical nature. The buried  
354 surface area of this complex was found to be 3031.4 ( $\pm 181$ )  $\text{\AA}^2$ , signifying a strong complex.  
355 The necessary mutations were introduced into the protein-protein complex by Swiss  
356 PDBViewer.

357 The starting structures for WT and the two mutants were simulated for 100ns. The stability  
358 for these structures was assessed by plotting the time evolution of their RMSD values with  
359 respect to the starting frame of simulation (as shown in Fig. 8). We observe that the WT and  
360 the S171L are stable having an average RMSD value around  $\sim 9\text{\AA}$ . Although the absolute  
361 value is high, yet the protein complexes reached stability and showed a plateau in the RMSD  
362 plot from  $\sim 40\text{ns}$ , again indicating a stable complex. However, for the D155Y system, the  
363 protein complex showed a lot more fluctuation and deviation from the starting structure. This  
364 indicates a not-so-stable complex structure, which is further supported by the lower  
365 PROVEAN score of D155Y (Table S6). Since the mutation is present in the vicinity of the  
366 caveolin binding domain in ORF3a, it can be said that the presence of the mutation leads to  
367 an unstable protein-protein complex formation. Thus, the D155Y substitution interfereswith  
368 the caveolin binding activity of ORF3a protein. We also calculated the free  
369 energy,corresponding to the binding of caveolin-1 to the ORF3a protein, in these three  
370 protein complex systems. The values for WT, D155Y and S171L were -37.6385 ( $\pm 8.3248$ )  
371 kcal/mol, -11.5504 ( $\pm 2.9333$ ) kcal/moland -31.9254 ( $\pm 5.0812$ ) kcal/mol, respectively. From  
372 these values, it is evident that the binding affinity of caveolin-1 is considerably less in D155Y  
373 mutant compared to WT and S171L. This is in corroboration with the unstable protein-  
374 protein complex in the D155Y system. The change in hydrogen bonding, salt bridge  
375 patternand hydrophobic interaction pattern associated with D155Y substitution may have  
376 contributed to the weakened interaction betweenD155YORF3a and caveolin-1.

377

#### 378 **4Discussion:**

379 In this study, we have established that D155Y substitution changes the intramolecular  
380 hydrogen bonding, salt bridge formation, and disrupts the interaction between ORF3a and  
381 caveolin-1.

382 Several other mutations are present in ORF3a of SARS-CoV-2. Wuet. *al.* have shown that the  
383 incidence of mutation at position 57 is high, compared to the other positions[47]. In order to  
384 consider the effect of mutation at the 57<sup>th</sup> position in D155Y and S171L, we simulated Q57H,  
385 Q57H-D155Y and Q57H-S171L variants of ORF3a, for 200ns. Their structural stabilities  
386 were calculated with MMGBSA and have been tabulated in Table 3. We noted that the  
387 structural stabilities for Q57H and the Q57H-S171L variants were comparable to WT,  
388 D155Y and S171L (values listed in Table 1).The Q57H-D155Y variant had considerably  
389 lesser stability.Previously Hassan *et.al.* reported the presence of H at the 57th position in  
390 ORF3a protein of pangolin CoV[22].Thus, we may hypothesize that the presence of H may  
391 provide natural stability of ORF3a.We checked the structural stability of W131C, W131R,  
392 G172C and G172V, which were found in Indian patients. We simulated the variants W131C,  
393 W131R, G172C and G172V for 200ns. These four variants were stable and showed an  
394 average RMSD value of 2.5Å with respect to the starting structure as shown in Fig. S4. The  
395 overall binding free energies for the four variants were also calculated, and we noted that the  
396 stabilities for the systems W131C, G172C and G172V were similar to that of the WT ORF3a  
397 protein as listed in Table 1. The variant W131R, was more stable than WT ORF3a. This  
398 indicates that these four mutants are very stable and can have independent existence. Further  
399 study is needed to check the effects of these substitutions both *in silico* and *in vitro*. On the  
400 contrary, mutation at 155<sup>th</sup> position (D155Y) reduced the binding affinity of ORF3a to  
401 caveolin. The disrupted interaction can be indicative of improved viral fitness, wherein, the  
402 virion particles can continue to build the host intracellular viral load without inducing host  
403 cell apoptosis or promoting their egress thus lengthening the asymptomatic phase of the  
404 infection. Contrariwise, the ORF3a-caveolin-1 affinity change can also affect the virion  
405 internalisation into host cells, endomembrane sorting and assembly of the viral components.

406 Direct Coupling Analysis revealed eight genes involved in epistatic interactions at several  
407 polymorphic loci. The locus of ORF3a is involved in three out of eight potentially significant  
408 epistatic links with, namely, nsp2, nsp6 and nsp12. These intragenetic interactions open up  
409 the possibility of potential evolutionary links of the above described substitutions at D155Y  
410 and S171L with other positively selected loci in viral genes, which is reportedly subject to  
411 demographic variations[48].Moreover, the Neanderthal-derived COVID-19 risk haplotype is

412 altogether positively selected in some populations and has 30% allele frequency thus  
413 introducing an evolutionary landscape to the current COVID-19 pandemic[49].

414 Our simulation studies and further analyses of ORF3a protein have shown that the presence of  
415 mutations affects the structural stability of the ORF3a protein. The residues involved in  
416 forming several stabilising interactions in these proteins also change with the presence of  
417 mutations. Although the overall stability of the protein structures in the WT and the two  
418 variants are not much different, these mutations may affect the binding affinity of ORF3a with  
419 its partner proteins. For instance, in this study we have shown the presence of mutation  
420 drastically reduces the binding affinity of ORF3a with caveolin-1. SARS-CoV-2 enters the  
421 host cell by both membrane fusion and by clathrin/caveolin-mediated endocytosis after  
422 binding to the ACE2 cell-surface receptors in the upper respiratory tract and alveolar  
423 epithelial cells[50-52]. Caveolin/cholesterol mediated endocytosis has been previously  
424 implicated in SARS-CoV through an in silico study wherein several caveolin-1 binding  
425 domains (CBD) were found in SARS-CoV proteins and internalisation of virion was  
426 proposed to be facilitated in a caveolin-1 and lipid raft-dependent manner. However, the role  
427 of caveolin-1 was not limited to viral entry. Rather, it was associated with all stages of viral  
428 life cycle starting from virus binding to surface receptors, fusion and endomembrane  
429 trafficking of virus in caveosomes, sorting of viral components to endomembrane surfaces,  
430 replication, assembly and to subsequent egress. The host-derived lipid bilayer surrounding  
431 the enveloped viral nucleocapsid contains caveolin-1 incorporated during viral fission from  
432 the host membrane [53]. Thus, binding interactions of SARS-CoV-2 ORF3a WT and  
433 mutational variants with caveolin-1 provides a putative alternative route for viral  
434 pathogenesis in COVID-19. Change in interaction of D155Y ORF3a with caveolin-1 may  
435 provide an alternative route to exhibit SARS-CoV-2 virulence properties in COVID-19  
436 patients.

437 Cryo-EM structural analysis of SARS-CoV-2 proteins shows that ORF3a can exist in dimeric  
438 and tetrameric complex arrangements with six functional domains (Domain I to VI) of each  
439 protomer. The protein comprises of 3 helices, spanning the transmembrane domain (Domains  
440 II and III) and a cytosolic domain with multiple beta-strands (Domain IV, V, VI) [20,54].  
441 Each domain of SARS-CoV ORF3a interacts with different host proteins and modulates host  
442 signalling pathways. Domain II has binding sites for TRAF3 and ASC, and interacts to  
443 activate NLRP3 inflammasome[5]. Domain III has a conserved Cysteine residue at 133<sup>rd</sup>  
444 position known to stabilize ORF3a homodimer and homotetramers for its ion channel



445 activity[43,54].Cytosolic domain IV has a conserved motif YDANYFVCW from amino acids  
446 141-149 that binds with host caveolin-1[55].Finally, domains V and VI, comprising of the  
447 YXX $\phi$  and diacidicExD motifs respectively, are essential for intracellular viral protein  
448 sorting, trafficking and localization of ORF3a to the host membrane followed by its release  
449 into culture medium[14]. The various other host proteins as binding partners to ORF3a  
450 protein include components of the anti-inflammatory pathway HMOX1, innate immune  
451 signalling pathway, TRIM59, glycosylation pathway (ALG5) and nucleus-inner-membrane  
452 proteins (SUN2 and ARL6IP6)[56]. ORF3a also regulates Caspase 8-mediated extrinsic  
453 apoptotic pathway for its pro-apoptotic activity in HEK293T cells[17]. Thus, mutations in the  
454 binding regions or in its close proximity may interfere with the host protein-viral ORF3a  
455 interaction, which needs to be further validated. SARS-CoV-2 ORF3a was among the other  
456 candidate proteins that has been found to elicit significant CD4+ and CD8+ T-cell response  
457 and it has been suggested that an optimal vaccine should be inclusive of class I epitopes  
458 derived from M, nsp6 and ORF3a[57-59].Our *in silico* study provides support to carry out *in*  
459 *vivo* and *in vitro* studies for evaluating viral pathogenesis with mutant SARS-CoV-2.

460

461 **Author contributions:** PB and SSJ conceptualized the study. SG and PB performed  
462 experimental work. SG, PB, DM, KB, SS and SSJ contributed to analysis of the results and  
463 preparation of the figures. SG, DM and KB were involved in the bioinformatics analysis of  
464 the data. SG, DM and KB wrote the initial draft of the manuscript. SSJ and PB edited the  
465 manuscript with input from all the authors. All authors agreed to the submission of this work  
466 to the Journal of General Virology.

467 **Conflicts of interest:**

468 The authors declare that there are no conflicts of interest.

469 **Funding Information:**This study was funded by Technical Research Centre (TRC), Indian  
470 Association for the Cultivation of Science (IACS), Kolkata, India.

471 **Acknowledgements**

472 This work was supported by the Indian Association for the Cultivation of Science (IACS).  
473 We thank Google Cloud Research Credits (GCRC) program and the high-performance  
474 computing (HPC) support provided by Fluid Numerics. We also thank IACS for fellowship to



475 SG and DM, DST-INSPIRE for fellowship to KB, and SERB-DIA (DIA/2018/000005)  
476 award to SSJ.

477 **Abbreviations:**

478 ARL6IP6: ADP Ribosylation Factor Like GTPase 6 interacting protein 6, ASC: Apoptosis-  
479 associated speck-like protein containing a caspase recruitment domain, BLAST: Basic Local  
480 Alignment Search Tool, CD4+: Cluster of Differentiation 4+, CD8+: Cluster of  
481 Differentiation 8+, COVID-19: Coronavirus Disease 2019, Cryo-EM: Cryo Electron  
482 Microscope, HMOX1: Heme Oxygenase 1, IFN: Interferon, MERS-CoV: Middle East  
483 respiratory syndrome coronavirus, MMGBSA: Molecular mechanics with generalized Born  
484 and surface area solvation, NCBI: National Centre for Biotechnology Information, NF- $\kappa$ B:  
485 Nuclear factor kappa light chain enhancer of activated B cells, NLRP3: Nucleotide-binding  
486 oligomerization domain, Leucine rich repeat and Pyrin domain containing, ORF: Open  
487 Reading Frame, PDB: Protein Data Bank, PISA: Protein Interfaces Surfaces and Assemblies,  
488 PROVEAN: Protein Variation Effect Analyzer, RMSD: Root Mean Square Deviation, SUN2:  
489 SUN domain-containing protein 2, TRIM59: Tripartite motif-containing protein 59.

490

491

492

493

494 **Figure legends**

495 **Fig. 1 Distribution of mutations in ORF3a protein.** The number of instances of the various  
496 mutations at different positions of ORF3a protein in the total number of samples considered  
497 in this study has been plotted in (a). The global distribution of the mutations at positions 155  
498 and 171 have been shown in blue and red respectively in (b)

499 **Fig. 2 Structure of ORF3a protein.** The structure of WT ORF3a (PDB ID: 6XDC) marking  
500 the functional domains as known from literature has been shown. The positions of mutation  
501 at the 155<sup>th</sup> and 171<sup>st</sup> positions have been shown in orange and cyan spheres respectively.

502 **Fig. 3 Stability of structure.** The time evolution of the RMSD of the ORF3a proteins with  
503 respect to the starting structure. (a) Black: WT, (b) Red: D155Y and (c) Green: S171L

504 **Fig. 4 Flexibility of residues.** The B-Factor plot for ORF3a for the three systems. (a) Black:  
505 WT, (b) Red: D155Y and (c) Green: S171L

506 **Fig. 5 Visualization of residue interaction network in SARS-CoV-2 ORF3a protein**  
507 **using Gephi[60].**(a) The whole residue interaction network showing the complete cover C,  
508 with nodes coloured with the membership colour of a particular cluster, (b) A magnified view  
509 of the residue interaction network, and (c) Shows one particular residue (here, GLY209) and  
510 the residues it is directly interacting with.

511 **Fig. 6 Interactome clusters in SARS-CoV-2 ORF3a protein.** The different interactomes  
512 are shown for (a) WT, (b) D155Y and (c) S171L

513 **Fig. 7 Modelling the human caveolin-1 structure.** (a) The ERRAT analysis of the modelled  
514 structure of caveolin-1. (b) The distribution of the residues of the modelled structure on the  
515 Ramachandran Plot.(c) The ERRAT analysis of the simulated structure of caveolin-1. (d) The  
516 distribution of the residues of the simulated structure on the Ramachandran Plot.

517 **Fig. 8 Stability of the ORF3a-caveolin-1 complex.** The time evolution of the RMSD of the  
518 ORF3a-caveolin-1 complex with respect to the starting structure. (a) Black: WT-caveolin-1,  
519 (b) Red: D155Y-caveolin-1 and (c) Green: S171L-caveolin-1

520

521 **References**

- 522 1. **V'kovski P, Kratzel A, Steiner S, Stalder H, Thiel V.** Coronavirus biology and  
523 replication: implications for SARS-CoV-2. *Nature Reviews Microbiology*  
524 2020;19:155–170.
- 525 2. **Asia S-WHO.** India Situation. 2020;10–11.
- 526 3. Mortality Analyses - Johns Hopkins Coronavirus Resource Center.  
527 <https://coronavirus.jhu.edu/data/mortality> (accessed 31 December 2020).
- 528 4. **Naqvi AAT, Fatima K, Mohammad T, Fatima U, Singh IK, et al.** Insights into  
529 SARS-CoV-2 genome, structure, evolution, pathogenesis and therapies: Structural  
530 genomics approach. *BBA - Mol Basis Dis* 2020;1–17.
- 531 5. **Siu KL, Yuen KS, Castano-Rodriguez C, Ye ZW, Yeung ML, et al.** Severe acute  
532 respiratory syndrome Coronavirus ORF3a protein activates the NLRP3 inflammasome  
533 by promoting TRAF3-dependent ubiquitination of ASC. *FASEB J* 2019;33:8865–  
534 8877.
- 535 6. **Tan Y-J, Teng E, Shen S, Tan THP, Goh P-Y, et al.** A Novel Severe Acute  
536 Respiratory Syndrome Coronavirus Protein, U274, Is Transported to the Cell Surface  
537 and Undergoes Endocytosis. *J Virol* 2004;78:6723–6734.
- 538 7. **Firth AE.** A putative new SARS-CoV protein, 3c, encoded in an ORF overlapping  
539 ORF3a. *J Gen Virol* 2020;101:1085–1089.
- 540 8. **Finkel Y, Mizrahi O, Nachshon A, Weingarten-Gabbay S, Morgenstern D, et al.**  
541 The coding capacity of SARS-CoV-2. *Nature*. Epub ahead of print 2020. DOI:  
542 10.1038/s41586-020-2739-1.
- 543 9. **Konno Y, Kimura I, Uriu K, Fukushi M, Irie T, et al.** SARS-CoV-2 ORF3b Is a  
544 Potent Interferon Antagonist Whose Activity Is Increased by a Naturally Occurring  
545 Elongation Variant. *Cell Rep* 2020;32:108185.
- 546 10. **Yount B, Roberts RS, Sims AC, Deming D, Frieman MB, et al.** Severe Acute  
547 Respiratory Syndrome Coronavirus Group-Specific Open Reading Frames Encode  
548 Nonessential Functions for Replication in Cell Cultures and Mice. *J Virol*  
549 2005;79:14909–14922.

- 550 11. **Oostra M, de Haan CAM, de Groot RJ, Rottier PJM.** Glycosylation of the Severe  
551 Acute Respiratory Syndrome Coronavirus Triple-Spanning Membrane Proteins 3a and  
552 M. *J Virol* 2006;80:2326–2336.
- 553 12. **Tan YJ.** The Severe Acute Respiratory Syndrome (SARS)-coronavirus 3a protein may  
554 function as a modulator of the trafficking properties of the spike protein. *Virology*  
555 *Journal* 2005;2:5.
- 556 13. **Zeng R, Yang RF, Shi M De, Jiang MR, Xie YH, et al.** Characterization of the 3a  
557 protein of SARS-associated coronavirus in infected vero E6 cells and SARS patients. *J*  
558 *Mol Biol* 2004;341:271–279.
- 559 14. **Huang C, Narayanan K, Ito N, Peters CJ, Makino S.** Severe Acute Respiratory  
560 Syndrome Coronavirus 3a Protein Is Released in Membranous Structures from 3a  
561 Protein-Expressing Cells and Infected Cells. *J Virol* 2006;80:210–217.
- 562 15. **Tan Y-J, Tham P-Y, Chan DZL, Chou C-F, Shen S, et al.** The Severe Acute  
563 Respiratory Syndrome Coronavirus 3a Protein Up-Regulates Expression of Fibrinogen  
564 in Lung Epithelial Cells. *J Virol* 2005;79:10083–10087.
- 565 16. **Minakshi R, Padhan K, Rani M, Khan N, Ahmad F, et al.** The SARS coronavirus  
566 3a protein causes endoplasmic reticulum stress and induces ligand-independent  
567 downregulation of the Type 1 interferon receptor. *PLoS One* 2009;4:e8342.
- 568 17. **Ren Y, Shu T, Wu D, Mu J, Wang C, et al.** The ORF3a protein of SARS-CoV-2  
569 induces apoptosis in cells. *Cellular and Molecular Immunology* 2020;17:881–883.
- 570 18. **Roy C, Mandal SM, Mondal SK, Mukherjee S, Mapder T, et al.** Trends of  
571 mutation accumulation across global SARS-CoV-2 genomes: Implications for the  
572 evolution of the novel coronavirus. *Genomics* 2020;112:5331–5342.
- 573 19. **Velazquez-Salinas L, Zarate S, Eberl S, Gladue DP, Novella I, et al.** Positive  
574 Selection of ORF1ab, ORF3a, and ORF8 Genes Drives the Early Evolutionary Trends  
575 of SARS-CoV-2 During the 2020 COVID-19 Pandemic. *Front Microbiol*  
576 2020;11:550674.
- 577 20. **Issa E, Merhi G, Panossian B, Salloum T, Tokajian S.** SARS-CoV-2 and ORF3a:  
578 Nonsynonymous Mutations, Functional Domains, and Viral Pathogenesis. *mSystems*;5.  
579 Epub ahead of print 5 May 2020. DOI: 10.1128/msystems.00266-20.

- 580 21. **Gonzalez-Reiche AS, Hernandez MM, Sullivan MJ, Ciferri B, Alshammery H, et**  
581 **al.** Introductions and early spread of SARS-CoV-2 in the New York City area. *Science*  
582 (80- ) 2020;369:297–301.
- 583 22. **Hassan SS, Choudhury PP, Basu P, Jana SS.** Molecular conservation and  
584 differential mutation on ORF3a gene in Indian SARS-CoV2 genomes. *Genomics*  
585 2020;112:3226–3237.
- 586 23. **Wu F, Zhao S, Yu B, Chen YM, Wang W, et al.** A new coronavirus associated with  
587 human respiratory disease in China. *Nature* 2020;579:265–269.
- 588 24. **Choi Y, Chan AP.** PROVEAN web server: A tool to predict the functional effect of  
589 amino acid substitutions and indels. *Bioinformatics* 2015;31:2745–2747.
- 590 25. **Kern D, Sorum B, Hoel C, Sridharan S, Remis J, et al.** Cryo-EM structure of the  
591 SARS-CoV-2 3a ion channel in lipid nanodiscs. *bioRxiv Prepr Serv Biol.* Epub ahead  
592 of print 2020. DOI: 10.1101/2020.06.17.156554.
- 593 26. **Krissinel E, Henrick K.** Inference of Macromolecular Assemblies from Crystalline  
594 State. *J Mol Biol* 2007;372:774–797.
- 595 27. **Guex N, Peitsch MC.** SWISS-MODEL and the Swiss-PdbViewer: An environment  
596 for comparative protein modeling. *Electrophoresis* 1997;18:2714–2723.
- 597 28. **Case DA, Belfon K, Ben-Shalom IY, Kollman PA, et al.**(2020), AMBER 2020,  
598 University of California, San Francisco.
- 599 29. **Maier JA, Martinez C, Kasavajhala K, Wickstrom L, Hauser KE, et al.** ff14SB:  
600 Improving the Accuracy of Protein Side Chain and Backbone Parameters from ff99SB.  
601 *J Chem Theory Comput* 2015;11:3696–3713.
- 602 30. **Jorgensen WL, Chandrasekhar J, Madura JD, Impey RW, Klein ML.**  
603 Comparison of simple potential functions for simulating liquid water. *J Chem Phys*  
604 1983;79:926–935.
- 605 31. **Roe DR, Cheatham TE.** PTRAJ and CPPTRAJ: Software for processing and analysis  
606 of molecular dynamics trajectory data. *J Chem Theory Comput* 2013;9:3084–3095.
- 607 32. **Humphrey W, Dalke A, Schulten K.** VMD: Visual molecular dynamics. *J Mol*  
608 *Graph* 1996;14:33–38.

- 609 33. **Miller BR, McGee TD, Swails JM, Homeyer N, Gohlke H, et al.** MMPBSA.py: An  
610 efficient program for end-state free energy calculations. *J Chem Theory Comput*  
611 2012;8:3314–3321.
- 612 34. **Blondel VD, Guillaume JL, Lambiotte R, Lefebvre E.** Fast unfolding of  
613 communities in large networks. *J Stat Mech Theory Exp* 2008;2008:P10008.
- 614 35. **Yang J, Yan R, Roy A, Xu D, Poisson J, et al.** The I-TASSER suite: Protein  
615 structure and function prediction. *Nature Methods* 2014;12:7–8.
- 616 36. **Yang J, Zhang Y.** I-TASSER server: New development for protein structure and  
617 function predictions. *Nucleic Acids Res* 2015;43:W174–W181.
- 618 37. **Roy A, Kucukural A, Zhang Y.** I-TASSER: A unified platform for automated protein  
619 structure and function prediction. *Nat Protoc* 2010;5:725–738.
- 620 38. **Ramachandran GN, Ramakrishnan C, Sasisekharan V.** Stereochemistry of  
621 polypeptide chain configurations. *Journal of Molecular Biology* 1963;7:95–99.
- 622 39. **Colovos C, Yeates TO.** Verification of protein structures: Patterns of nonbonded  
623 atomic interactions. *Protein Sci* 1993;2:1511–1519.
- 624 40. **Pettersen EF, Goddard TD, Huang CC, Couch GS, Greenblatt DM, et al.** UCSF  
625 Chimera - A visualization system for exploratory research and analysis. *J Comput*  
626 *Chem* 2004;25:1605–1612.
- 627 41. **Dominguez C, Boelens R, Bonvin AMJJ.** HADDOCK: A protein-protein docking  
628 approach based on biochemical or biophysical information. *J Am Chem Soc*  
629 2003;125:1731–1737.
- 630 42. **Cai Q-C, Jiang Q-W, Zhao G-M, Guo Q, Cao G-W, et al.** Putative caveolin-binding  
631 sites in SARS-CoV proteins. *Acta Pharmacol Sin* 2016;24:1051059–1051059.
- 632 43. **Lu W, Zheng BJ, Xu K, Schwarz W, Du L, et al.** Severe acute respiratory  
633 syndrome-associated coronavirus 3a protein forms an ion channel and modulates virus  
634 release. *Proc Natl Acad Sci U S A* 2006;103:12540–12545.
- 635 44. **Ravid D, Leser GP, Lamb RA.** A Role for Caveolin 1 in Assembly and Budding of  
636 the Paramyxovirus Parainfluenza Virus 5. *J Virol* 2010;84:9749–9759.
- 637 45. **Padhan K, Tanwar C, Hussain A, Hui PY, Lee MY, et al.** Severe acute respiratory

- 638 syndrome coronavirus Orf3a protein interacts with caveolin. *J Gen Virol*  
639 2007;88:3067–3077.
- 640 46. **Pagadala NS, Syed K, Tuszynski J.** Software for molecular docking: a review.  
641 *Biophysical Reviews* 2017;9:91–102.
- 642 47. **Wu S, Tian C, Liu P, Guo D, Zheng W, et al.** Effects of SARS-CoV-2 mutations on  
643 protein structures and intraviral protein–protein interactions. *J Med Virol*  
644 2020;jmv.26597.
- 645 48. **Zeng HL, Dichio V, Horta ER, Thorell K, Aurell E.** Global analysis of more than  
646 50,000 SARS-CoV-2 genomes reveals epistasis between eight viral genes. *Proc Natl*  
647 *Acad Sci U S A* 2020;117:31519–31526.
- 648 49. **Zeberg H, Pääbo S.** The major genetic risk factor for severe COVID-19 is inherited  
649 from Neanderthals. *Nature* 2020;587:610–612.
- 650 50. **Inoue Y, Tanaka N, Tanaka Y, Inoue S, Morita K, et al.** Clathrin-Dependent Entry  
651 of Severe Acute Respiratory Syndrome Coronavirus into Target Cells Expressing  
652 ACE2 with the Cytoplasmic Tail Deleted. *J Virol* 2007;81:8722–8729.
- 653 51. **Wölfel R, Corman VM, Guggemos W, Seilmaier M, Zange S, et al.** Virological  
654 assessment of hospitalized patients with COVID-2019. *Nature* 2020;581:465–469.
- 655 52. **Fecchi K, Anticoli S, Peruzzo D, Iessi E, Gagliardi MC, et al.** Coronavirus Interplay  
656 With Lipid Rafts and Autophagy Unveils Promising Therapeutic Targets. *Frontiers in*  
657 *Microbiology* 2020;11:1821.
- 658 53. **Xing Y, Wen Z, Gao W, Lin Z, Zhong J, et al.** Multifaceted Functions of Host Cell  
659 Caveolae/Caveolin-1 in Virus Infections. *Viruses* 2020;12:487.
- 660 54. **Marquez-Miranda V, Rojas M, Duarte Y, Diaz-Franulic I, Holmgren M, et al.**  
661 Analysis of SARS-CoV-2 ORF3a structure reveals chloride binding sites. *bioRxiv*  
662 *Prepr Serv Biol.* Epub ahead of print 22 October 2020. DOI:  
663 10.1101/2020.10.22.349522.
- 664 55. **Padhan K, Tanwar C, Hussain A, Hui PY, Lee MY, et al.** Severe acute respiratory  
665 syndrome coronavirus Orf3a protein interacts with caveolin. *J Gen Virol*  
666 2007;88:3067–3077.



- 667 56. **Gordon DE, Jang GM, Bouhaddou M, Xu J, Obernier K, et al.** A SARS-CoV-2  
668 protein interaction map reveals targets for drug repurposing. *Nature* 2020;583:459–  
669 468.
- 670 57. **Mateus J, Grifoni A, Tarke A, Sidney J, Ramirez SI, et al.** Selective and cross-  
671 reactive SARS-CoV-2 T cell epitopes in unexposed humans. *Science* (80- );370. Epub  
672 ahead of print 2 October 2020. DOI: 10.1126/science.abd3871.
- 673 58. **Grifoni A, Weiskopf D, Ramirez SI, Mateus J, Dan JM, et al.** Targets of T Cell  
674 Responses to SARS-CoV-2 Coronavirus in Humans with COVID-19 Disease and  
675 Unexposed Individuals. *Cell* 2020;181:1489-1501.e15.
- 676 59. **Le Bert N, Tan AT, Kunasegaran K, Tham CYL, Hafezi M, et al.** SARS-CoV-2-  
677 specific T cell immunity in cases of COVID-19 and SARS, and uninfected controls.  
678 *Nature* 2020;584:457–462.
- 679 60. **Bastian M, Bastian M, Heymann S, Jacomy M.** Gephi: An Open Source Software  
680 for Exploring and Manipulating Networks. *Int AAAI Conf WEBLOGS Soc MEDIA;*  
681 *THIRD Int AAAI Conf WEBLOGS Soc MEDIA.*  
682 <http://citeseerx.ist.psu.edu/viewdoc/summary?doi=10.1.1.172.7704> (2009, accessed 6  
683 February 2021).
- 684
- 685

686 **LIST OF TABLES**

687

688 Table 1: The list of binding free energies for the three systems are given. The values in  
689 parentheses indicate their standard deviations.

| System | Free Energy (kcal/mol) |
|--------|------------------------|
| WT     | -5360.30 (12.95)       |
| D155Y  | -5263.66 (12.56)       |
| S171L  | -5375.66 (19.34)       |

690

691

692

693

694 Table 2: List of residues contributing to the overall stability of the systems

695

| WT      |                   | D155Y   |                   | S171L   |                   |
|---------|-------------------|---------|-------------------|---------|-------------------|
| Residue | Energy (kcal/mol) | Residue | Energy (kcal/mol) | Residue | Energy (kcal/mol) |
| ARG68   | -173.181          | ARG126' | -172.593          | ARG126' | -173.754          |
| ARG134  | -172.764          | ARG68   | -171.184          | ARG126  | -172.424          |
| ARG126  | -170.217          | ARG126  | -170.909          | ARG134  | -172.153'         |
| ARG134' | -169.607          | ARG68'  | -170.573          | ARG68'  | -171.78           |
| ARG126' | -169.45           | ARG134' | -168.276          | ARG68   | -170.225          |
| ARG122  | -168.216          | ARG122  | -166.244          | ARG122  | -168.148          |
| ARG68'  | -167.236          | ARG122' | -165.746          | ARG134' | -167.918          |
| ARG122' | -164.614          | ARG134  | -164.769          | ARG122' | -165.75           |
| ASP238' | -99.689           | ASP238  | -100.33           | ASP238' | -100.602          |
| ASP238  | -99.342           | ASP238' | -99.694           | ASP238  | -100.401          |

696

697

698 Table 3: The list of binding free energies for the different mutant ORF3a proteins are given.  
699 The values in parentheses indicate their standard deviations.

| System     | Free Energy (kcal/mol) |
|------------|------------------------|
| Q57H       | -5256.6964 (69.71)     |
| Q57H-D155Y | -5113.0428 (43.07)     |
| Q57H-S171L | -5251.6282 (68.42)     |
| W131C      | -5364.5810 (46.83)     |
| W131R      | -5740.5108 (53.43)     |
| G172C      | -5305.7174 (58.26)     |
| G172V      | -5379.1921 (61.07)     |

700

701

702

703

704

705

706

707

708

709

710 **LIST OF FIGURES**

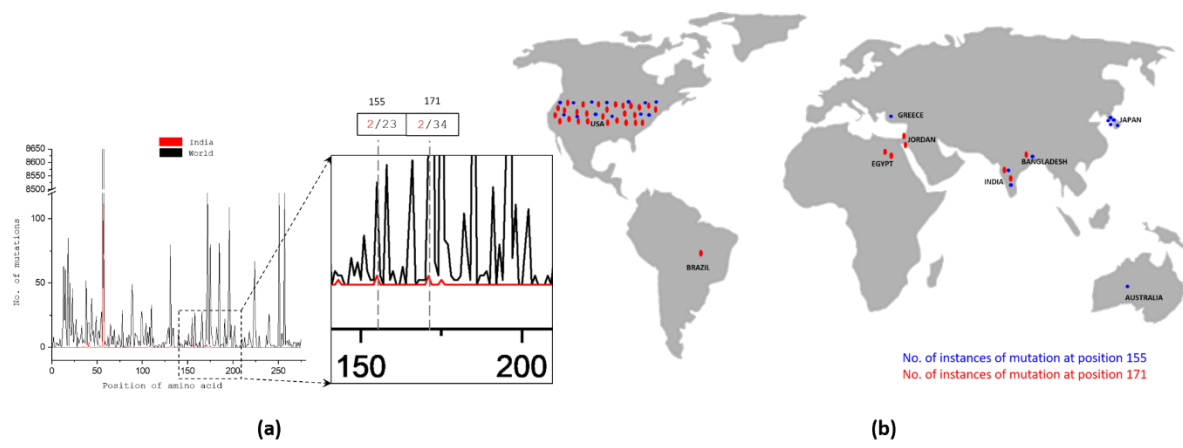

711 **Fig. 1**

712

713

714

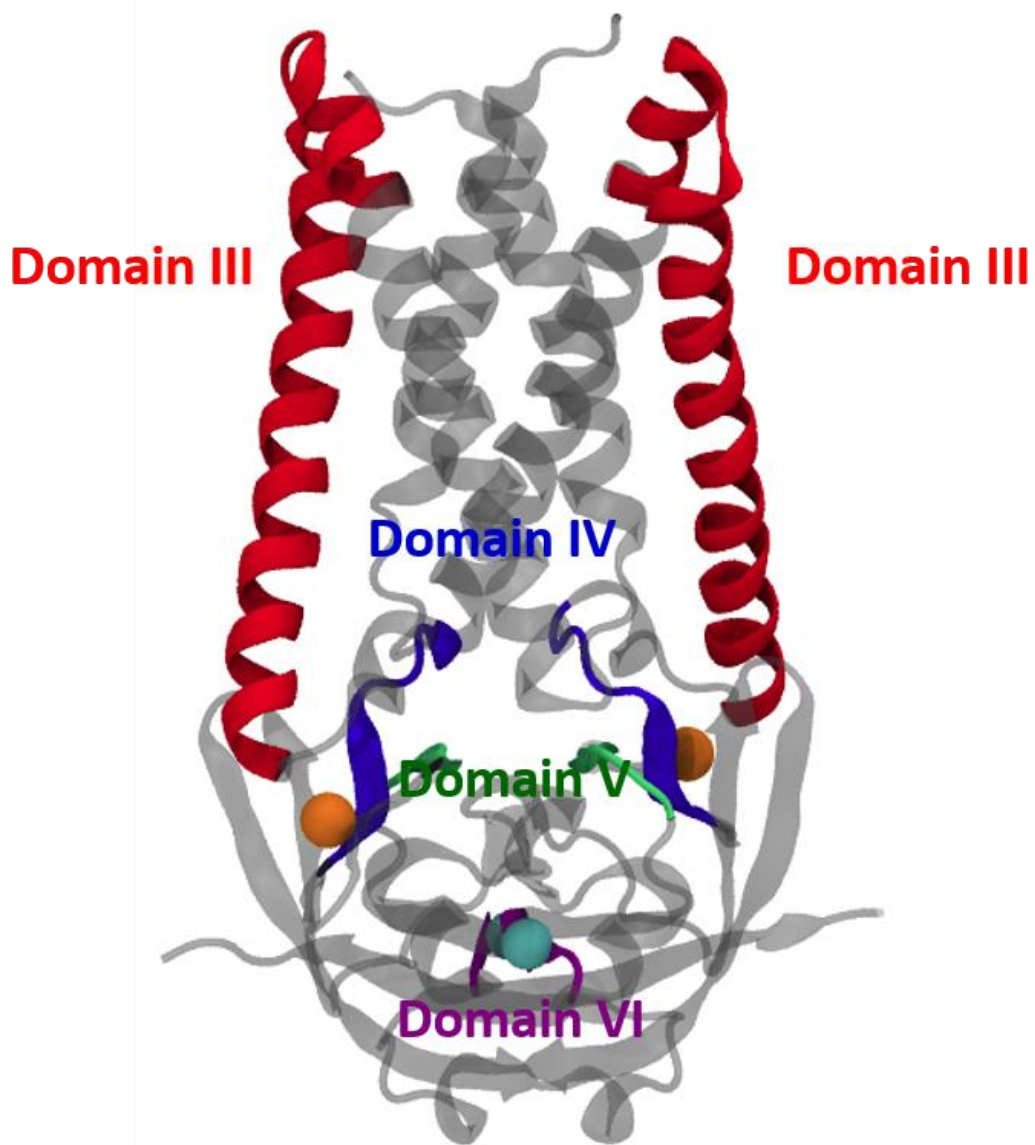

714

715

716

717

718

719

720

721

722

723

724

**Fig. 2**

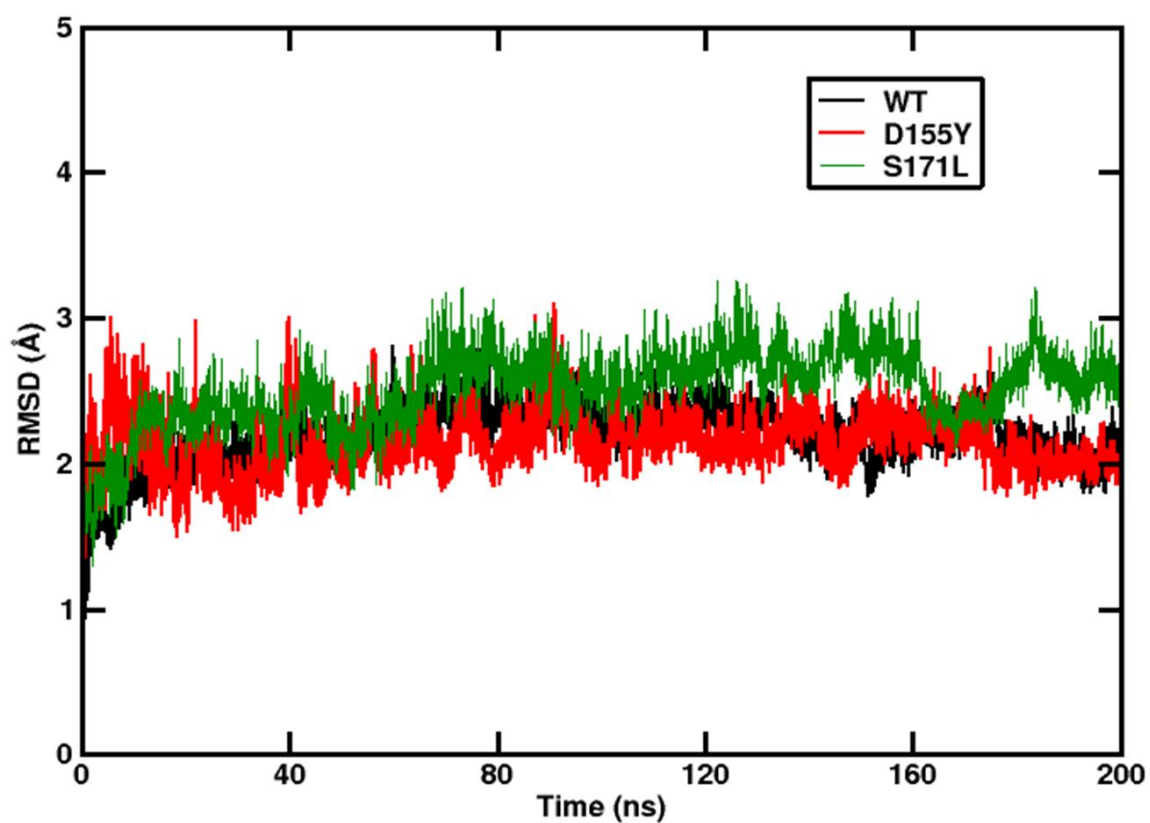

Fig. 3

725

726

727

728

729

730

731

732

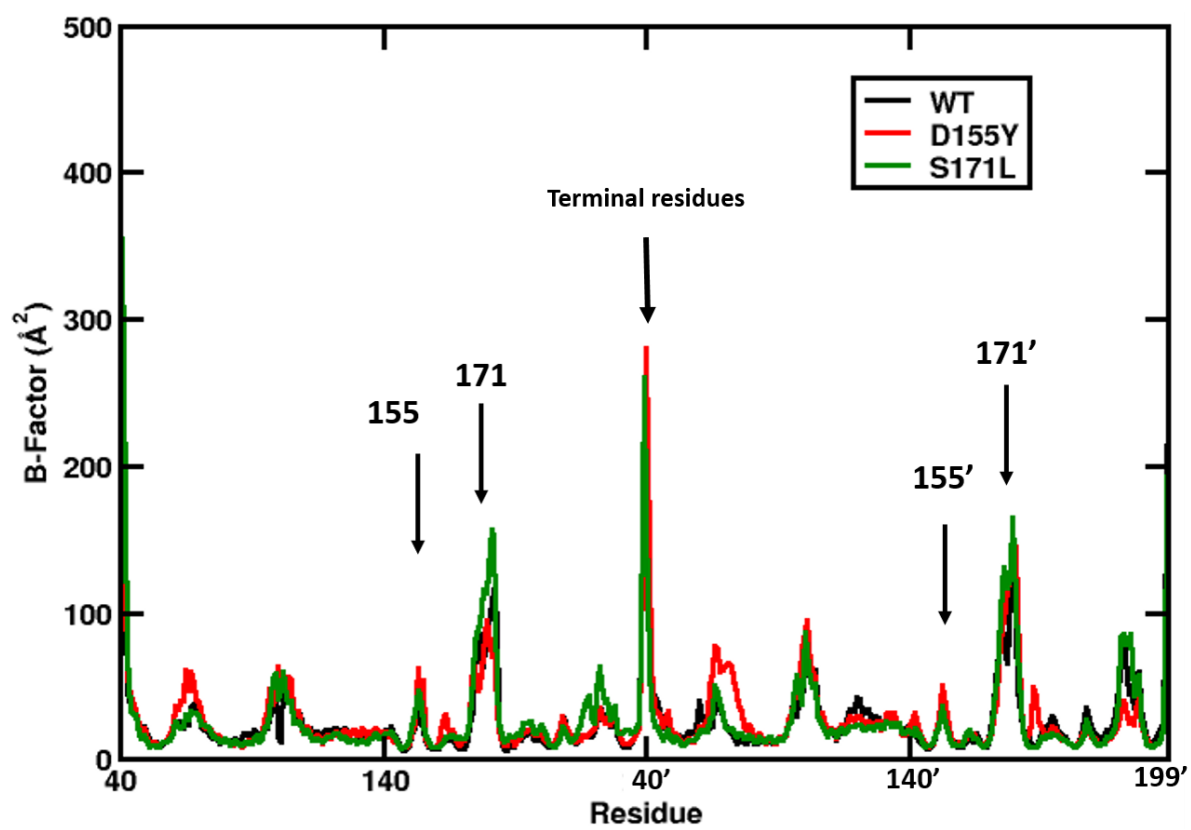

Fig. 4

733

734

735

736



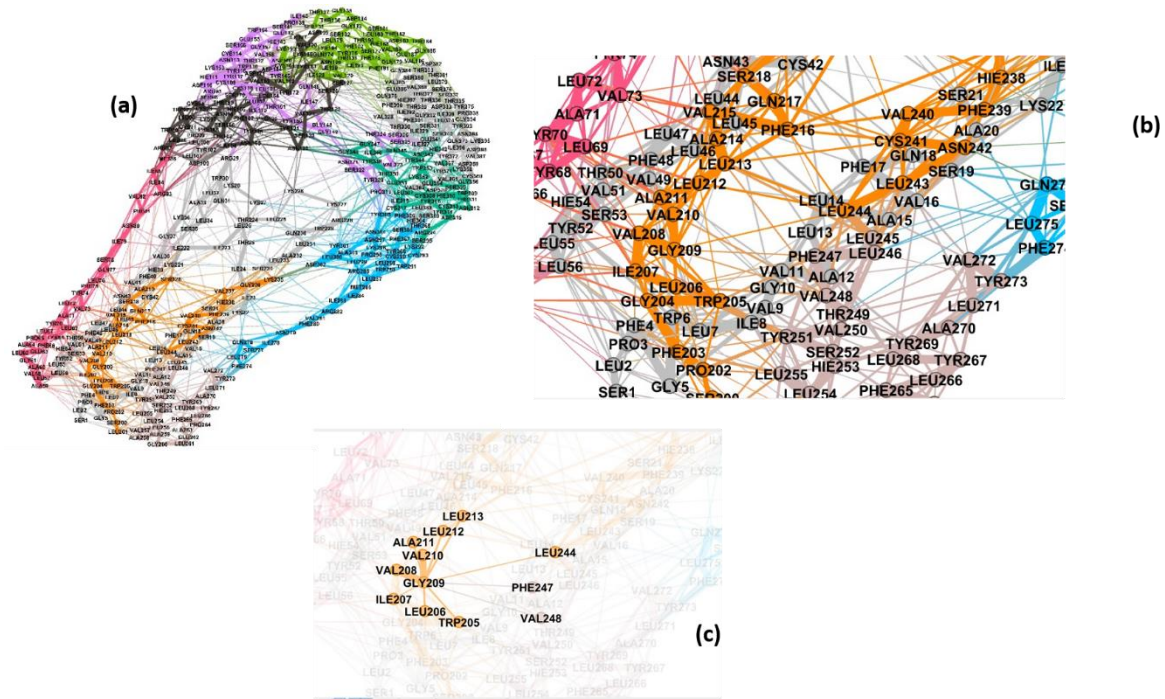

**Fig. 5**

737

738

739

740

741

742

743

744

745

746

747

748

749

750

751

752

753

754

755

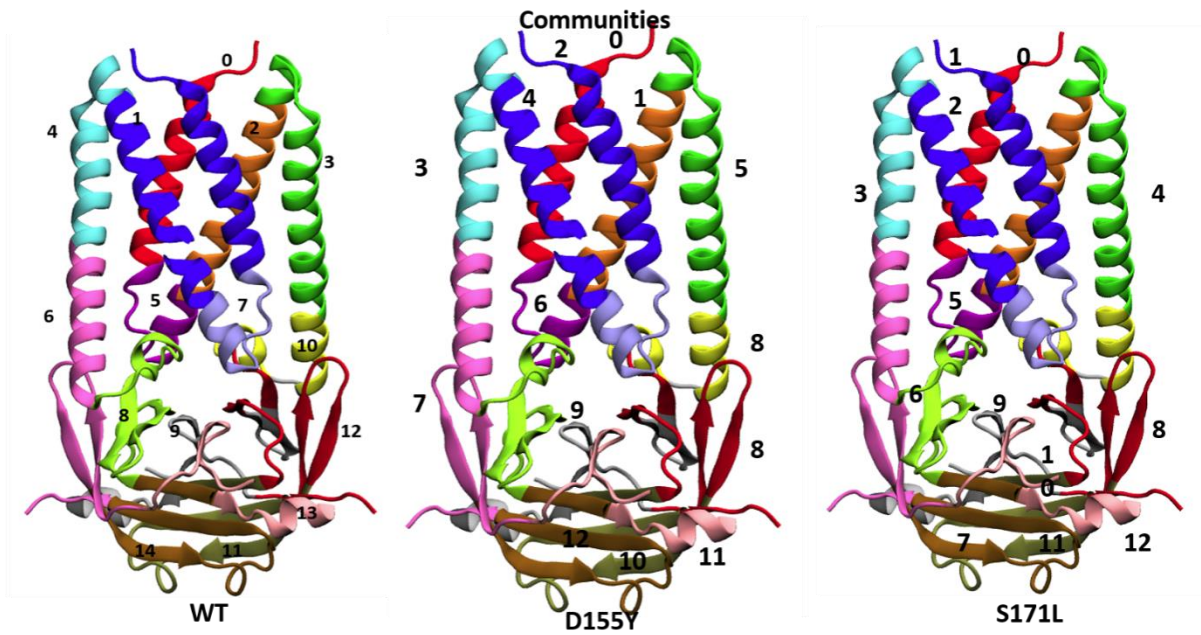

756

757

758

759

760

761

762

Fig. 6

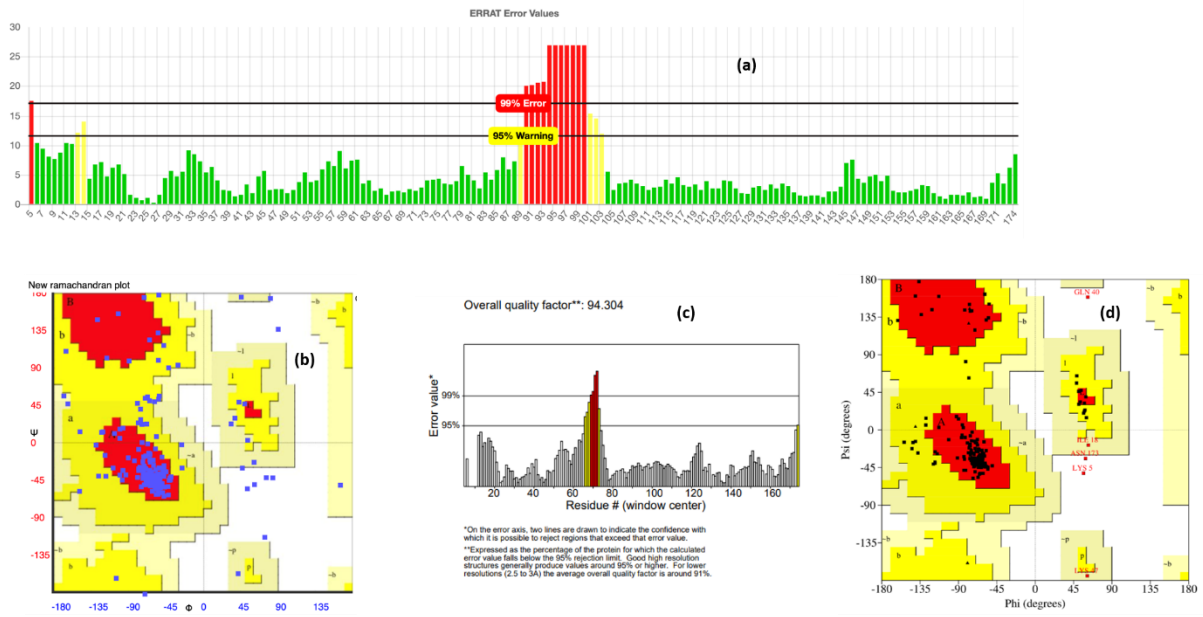

Fig. 7

763  
764

765

766

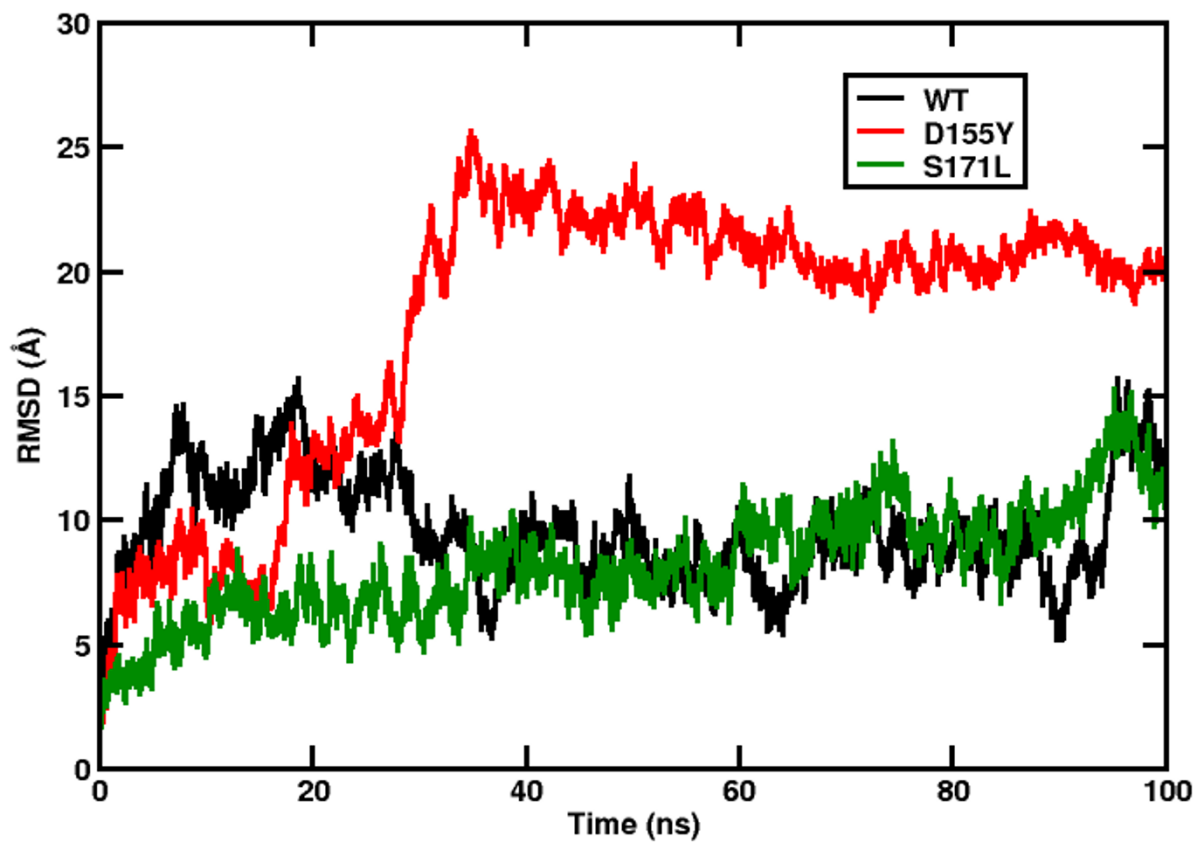

Fig. 8

767

768

769
